# Supplementary material
Source: MDPI journal article supplement (https://www.mdpi.com/2076-3417/14/9/3819)
Supplement: s1 [file s1]

Archive with 3 entries (3 files):
- applsci-2950813-supplementary-Figure S1.pdf
- Movie S1 Untreated.avi
- Movie S2 10 uM NE.avi
